# Supplementary material
Source: PubMed Central journal article supplement (PMC7376742)
Supplement: develop-146-174508-s1.pdf [file develop-146-174508-s1.pdf]

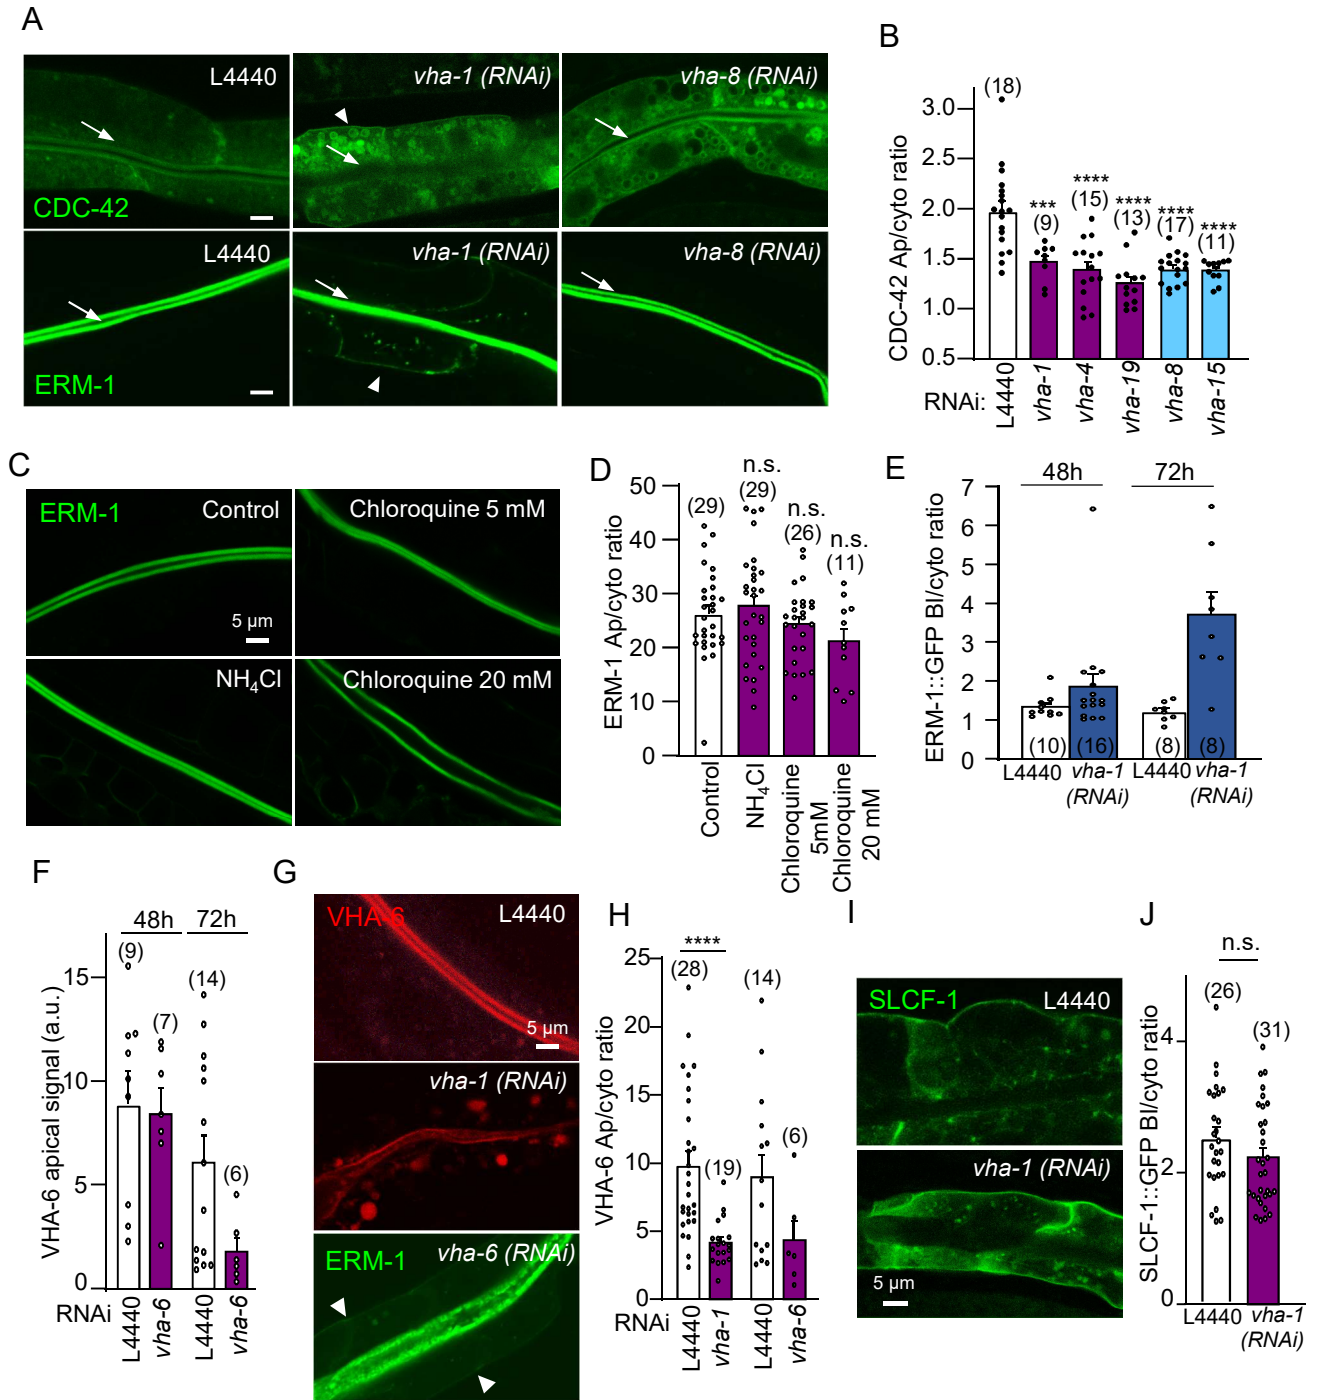

**Fig. S1. V0-ATPase silencing affects the polarized localization of polarity modules and brush border components.**

(A) Polarity screen results. GFP::CDC-42 (upper panels) and ERM-1::GFP (lower panels) expressing strains were silenced for control (L4440), V0/*vha-1* or V1/*vha-8* specific RNAi during 72h and imaged. Note the basolateral accumulation of both markers upon V0/*vha-1*(RNAi).

(B) Confirmation of the screen. CDC-42::GFP apical/cytoplasmic ratio was quantified upon silencing of the indicated V-ATPase subunits (n=1).

(C-D) Alkalinization of *C. elegans* intestine does not significantly affect ERM-1 polarized localization. Worms expressing ERM-1::mNG were treated during 24h with M9 alone (control) or supplemented with NH<sub>4</sub>Cl (20mM) or Chloroquine (5-20mM) and imaged. (C) shows representative experiments. (D) shows the quantification of ERM-1::mNG apical/cytoplasmic ratio (n=2).

(E) Time-dependent measurement of V0/*vha-1* effect on ERM-1 basolateral mislocalization. ERM-1::GFP expressing worms were silenced for V0/*vha-1* during 48 or 72h, imaged and ERM-1 basolateral/cytoplasmic ratio was quantified (n=1).

(F-H) Effect of 48-72h V0/*vha-1/6*(RNAi) on the expression of the V0-ATPase subunit VHA-6::mCh and the localization of ERM-1::GFP. (F) shows the quantification of VHA-6::mCh apical signal after 48h or 72h *vha-6*(RNAi) (n=1). (H) shows the quantification of VHA-6::mCh apical/cytoplasmic ratio in worms silenced for control (L4440), *vha-1* (n=3) or *vha-6* (n=1). Arrowheads in (G) show the basolateral mislocalization of ERM-1 upon *vha-6*(RNAi).

(I-J) Effect of 72h V0- or V1-ATPase silencing on the basolateral/cytoplasmic ratio of SLCF-1 (n=3). (H) shows a representative experiment. The histogram shows the mean  $\pm$  SEM, dots represent individual worms and the total number of worms is indicated in brackets. n.s. non-significant, \*\*\*p<0.001, \*\*\*\*p<0.0001. Arrows and arrowheads show the apical and basolateral PM, respectively. In all micrographs, worms are at the L4/young adult developmental stage.

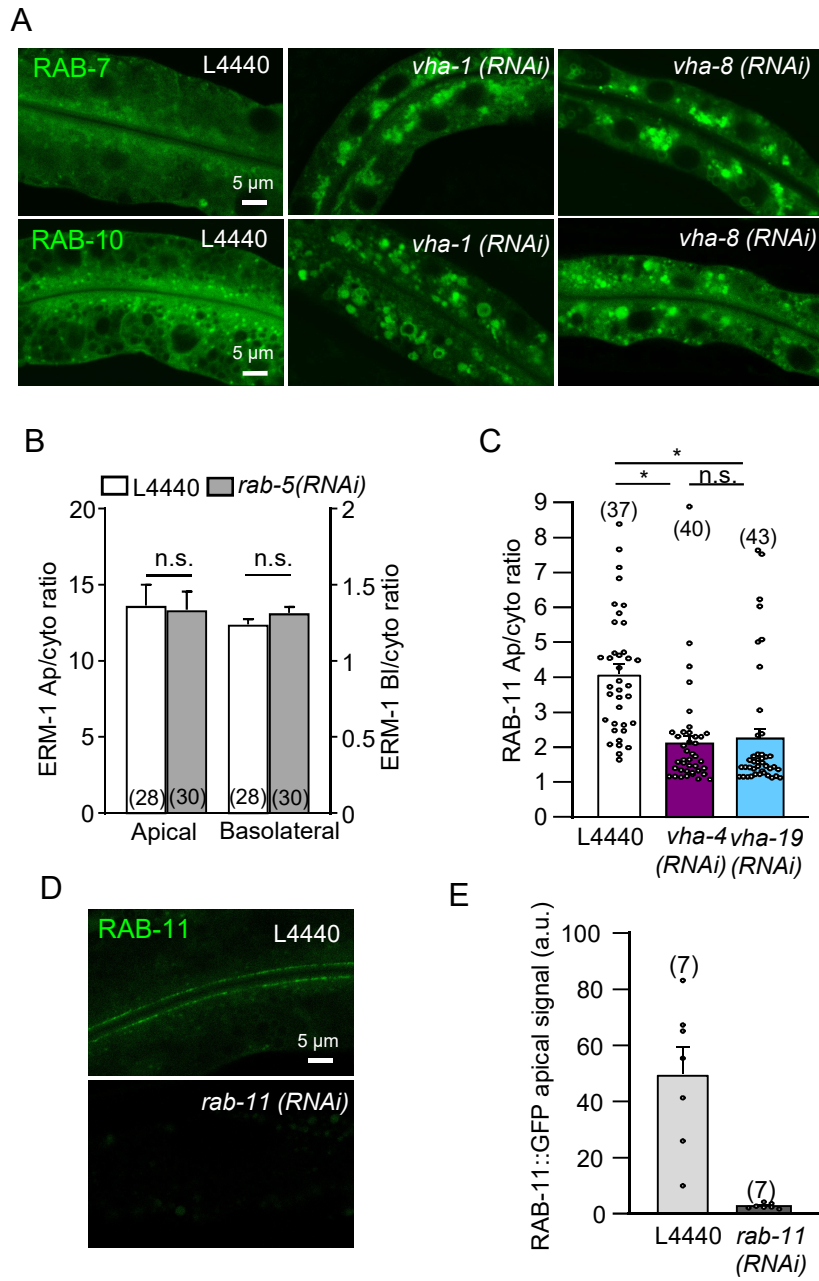

**Fig. S2. V0-ATPase polarity maintenance pathway.**

(A) Both V0/*vha-1* and V1/*vha-8(RNAi)* (72h) induce an accumulation of GFP::RAB-7 and GFP::RAB-10 in large cytoplasmic structures. Image shown is representative of 52-66 RAB-7::GFP and 38-58 RAB-10::GFP expressing worms observed for each condition, out of 3-5 independent experiments.

(B) *rab-5(RNAi)* does not affect the polarity of ERM-1. *rab-5* was silenced by RNAi during 72h in a strain expressing ERM-1::GFP, imaged and the apical/cytoplasmic (left) and basolateral/cytoplasmic (right) ratios of ERM-1 were quantified.

(C) Knockdown of the V0-ATPase subunits *vha-4* and *vha-19* induces a loss of RAB-11<sup>+</sup> endosomes. Histogram represents the quantification of the apical/cytoplasmic ratio of RAB-11::GFP. Mann-Whitney U-test.

(D-E) *rab-11(RNAi)* decreases RAB-11::GFP expression. (G) shows the quantification of RAB-11::GFP apical/cytoplasmic ratio.

Histograms are mean  $\pm$  SEM on each panel, dots represent individual worms and the total number of worms from 2 (B-C) or 1 (E) independent experiment(s) is indicated in brackets. n.s. non-significant, \* $p < 0.05$ . In all micrographs, worms are at the L4/young adult developmental stage.

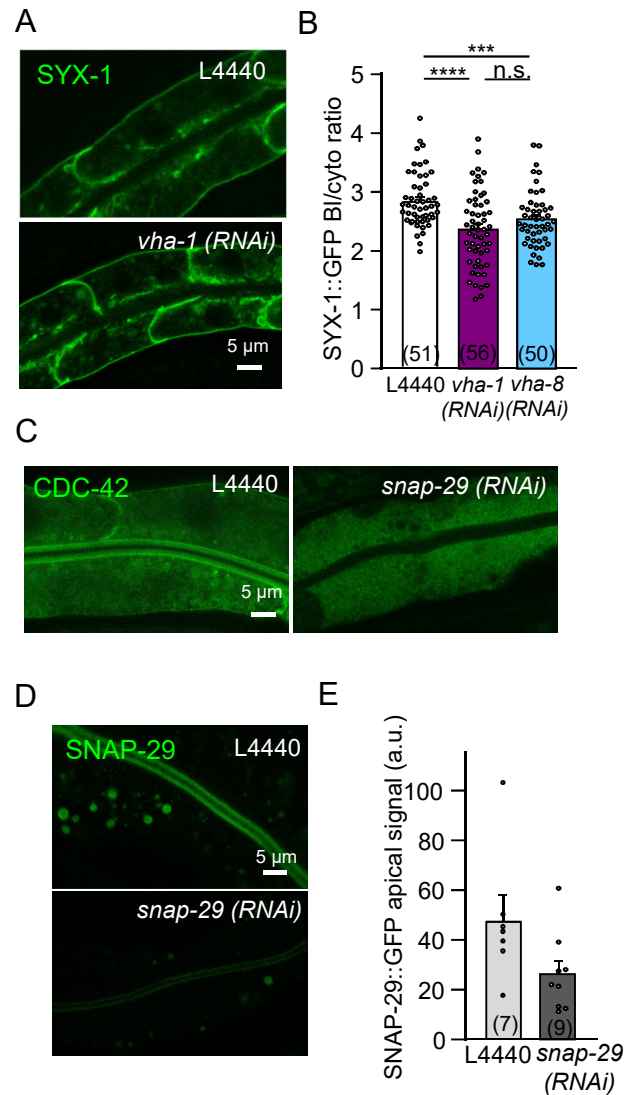

### Fig. S3. V0-ATPase polarity maintenance pathway.

(A-B) Effect of 72h V0- or V1-ATPase silencing on the basolateral/cytoplasmic ratio of SYX-1/SYN-1. Left panel shows a representative experiment.

(C-E) *snap-29(RNAi)* decreases CDC-42::GFP apical localization and SNAP-29::GFP expression. (E) shows the apical/cytoplasmic ratio of SNAP-29::GFP.

Histograms are mean  $\pm$  SEM on each panel, dots represent individual worms and the total number of worms from 3 (B) or 1 (E) experiment(s) is indicated in brackets. n.s. non-significant, \* $p < 0.05$ , \*\*\* $p < 0.001$ , \*\*\*\* $p < 0.0001$ . In all micrographs, worms are at the L4/young adult developmental stage.

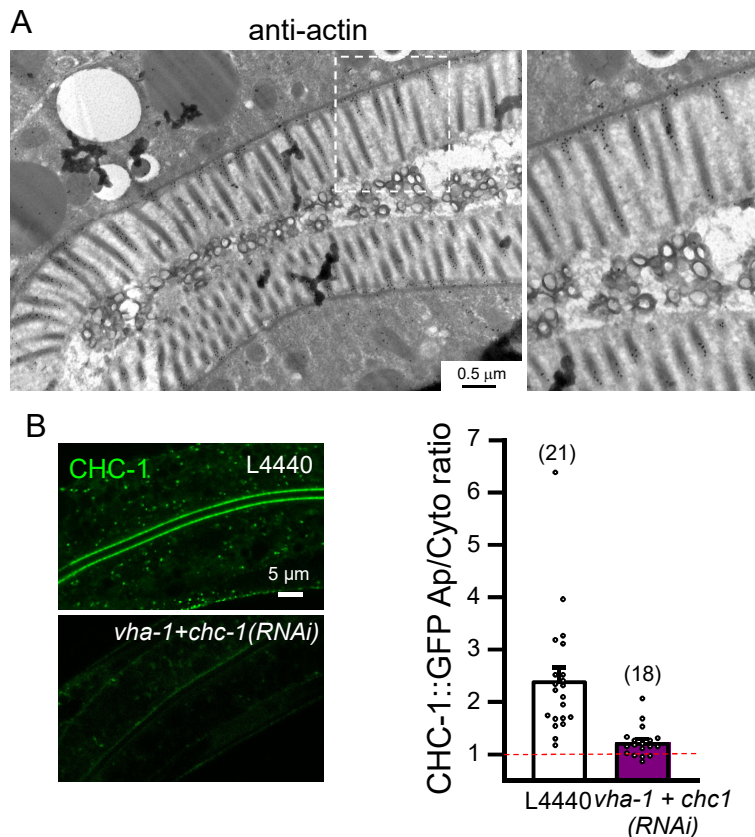

**Fig. S4. Controls of ACT-5::mCh staining and *chc-1* knockdown.**

(A) Fast-hybrid Tokuyasu-based immuno-EM on young adults using anti-actin antibody and protein A gold allows to visualize actin at both the microvilli and the terminal web level. Right micrograph shows an higher magnification of the selected area.

(B) Control of *vha-1/chc-1* genetic interaction. To evaluate *chc-1* silencing in genetic interaction experiments, CHC-1::GFP expressing worms were silenced for control (L4440) or equal amount of *vha-1* and *chc-1(RNAi)* in parallel of an ERM-1::GFP experiment (Fig. 5C) and imaged. Right panel shows the quantification of CHC-1::GFP apical/cytoplasmic ratio (n=1). Dotted line indicates a ratio of 1, which corresponds to an absence of apical enrichment. Histogram is mean  $\pm$  SEM, dots represent individual worms and the total number of worms is indicated in brackets. In micrographs, worms are at the L4/young adult developmental stage.

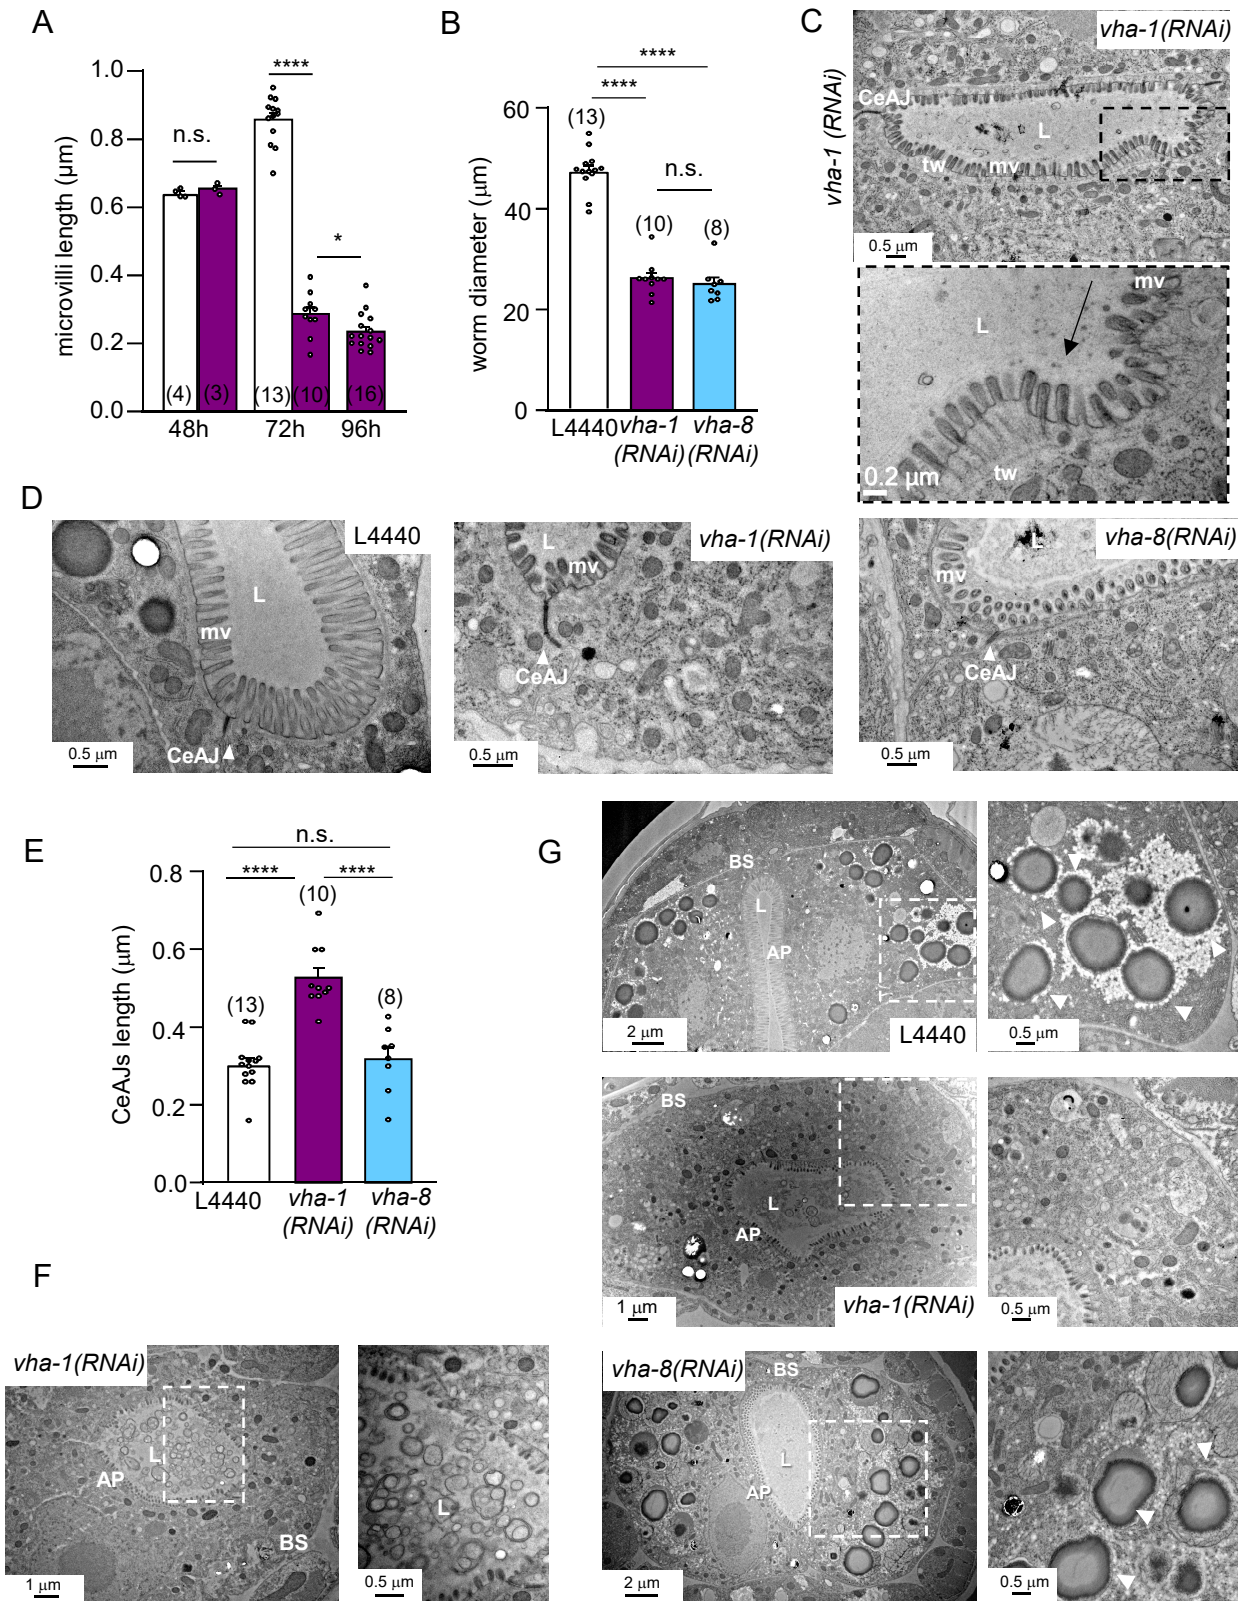

**Fig. S5. Ultrastructural analysis of V0-ATPase silencing associated defects.**

(A) V0/*vha-1*(RNAi) structural defects appear after 72h silencing. Histogram shows the measurement of microvilli length from TEM images (n=5 microvilli measured/worm).

(B) V0- or V1-ATPase subunits silencing affects *C. elegans* development. Histogram shows the measurement of the worms' diameter from TEM images.

(C-E) V0/*vha-1* silencing often induced a detachment of the PM from the terminal web (C) as well as (D-E) increased the length of cell junctions (CeAJ). (E) shows the measurement of the electron-dense cell-cell junction length on TEM pictures.

(F) V0/*vha-1* depleted worms accumulate cell and/or bacterial debris in the intestinal lumen.

(G) V0/*vha-1* depleted N2 worms, contrary to control or V1/*vha-8*-depleted worms, are devoid of yolk storage granules (arrows). L, lumen; mv, microvilli; tw, terminal web; AP, apical PM; BS, basal PM; CeAJ, *C. elegans* adherens junctions.

In micrographs, worms are at the L4/young adult (72h RNAi) or adult (96h RNAi) developmental stage.

Histograms show the mean  $\pm$  SEM, dots represent individual worms and the total number of worms is indicated in brackets. n.s. non-significant, \* $p < 0,05$ , \*\*\*\* $p < 0,0001$ .



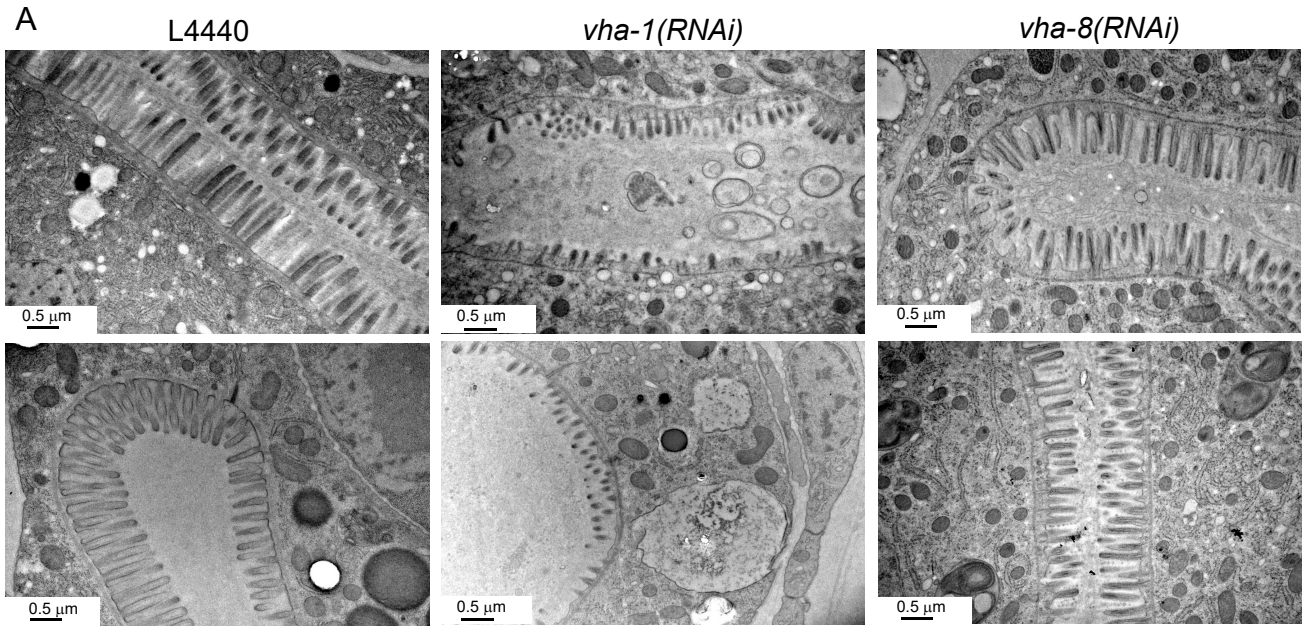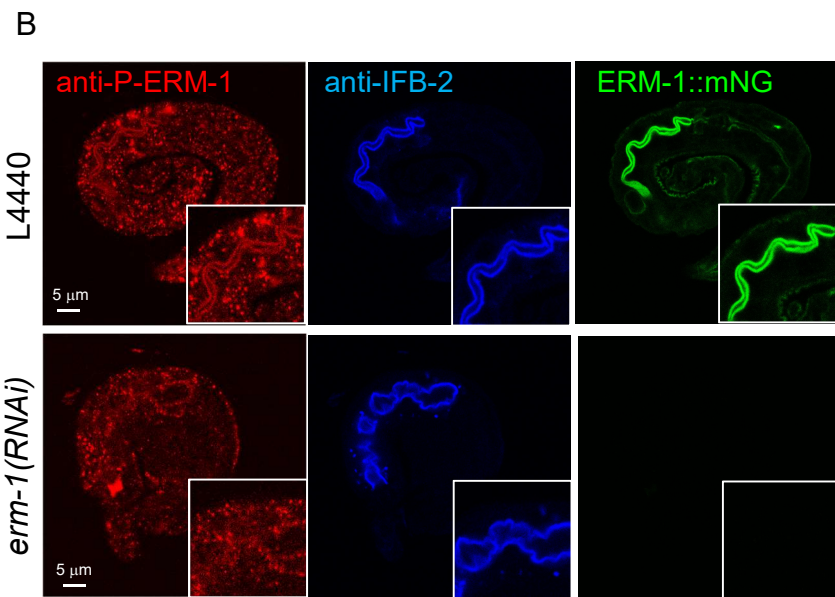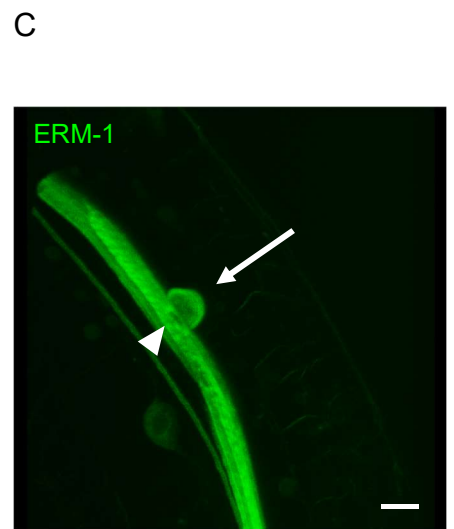

**Fig S6. Terminal web integrity upon V-ATPase silencing, P-ERM-1 antibody validation and MVIs onset by internalization of the apical PM.**

(A) The terminal web is preserved upon both *V0/vha-1* and *vha-8(RNAi)* silencing. L4440, *vha-1(RNAi)* or *vha-8(RNAi)* treated L4/young adults worms (72h) were analysed by TEM.

(B) Control of P-ERM-1 antibody. ERM-1::mNG expressing worms were silenced or not (L4440) for *erm-1*. Then, 3-fold stage embryos were fixed and stained for P-ERM-1 (red) or IFB-2 (MH33, blue) and imaged. Inserts are magnified selected areas.

(C) 3D projection of ERM-1::GFP expressing worms silenced for *V0/vha-1* during 72h. The arrow indicates the internalization of the apical PM. Note the large hole induced by the PM invagination (arrowhead). Scale bar: 5  $\mu$ m.

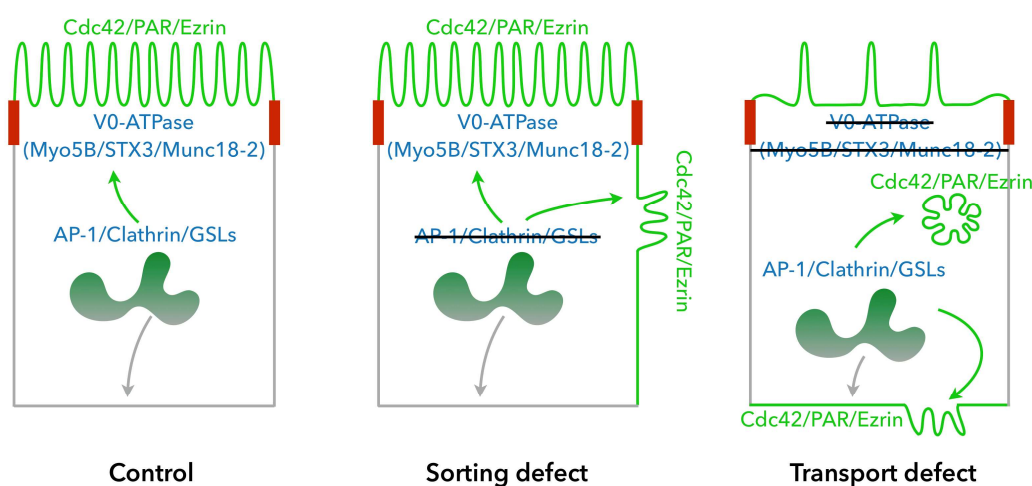

**Fig S7. Comparison of polarity maintenance pathways.**

In control cells, AP-1, Clathrin and GSLs ensure the correct sorting of polarity and brush border proteins, directly or through adaptor proteins, to the apical PM. PM targeting likely involves RAB-11<sup>+</sup> apical recycling endosomes, from which polarity/brush border/adaptors-containing vesicles fuse with the PM in a V0-ATPase/Myo5B/STX3/Munc18-2-dependent manner. Upon AP-1 and/or Clathrin and/or GSLs silencing, the early apical sorting step is defective, leading to a polarity inversion that induces the lateral accumulation of apical factors and the formation of laterally positioned ectopic apical membranes. Upon V0-ATPase or Myo5B/STX3/Munc18-2 silencing, a late apical exocytosis step is defective, which affects only trafficking (i.e. SNAP-29 or STX3) and induces the misrouting of polarity/brush border components to the basolateral PM or in MVIs.

|                                                |                   |                                                         |
|------------------------------------------------|-------------------|---------------------------------------------------------|
| 408 RNAi                                       | Family            | Gene                                                    |
| ↓                                              | COPI              | <i>E03H4.8/COP1</i>                                     |
|                                                |                   | <i>copb-1/COP1 beta</i>                                 |
| <i>copz-1/COP1 zeta</i>                        |                   |                                                         |
| <i>copb-2/COP1 beta prime</i>                  |                   |                                                         |
| <i>act-5</i>                                   |                   |                                                         |
| ↓                                              | Cytoskeleton      | <i>tba-1</i>                                            |
|                                                |                   | <i>tba-2</i>                                            |
| ↓                                              | ECM               | <i>noah-1</i>                                           |
|                                                | ER traffic        | <i>lpin-1</i>                                           |
| ↓                                              | Vesicle transport | <i>sam-4</i>                                            |
|                                                | GSL               | <i>fasn-1</i>                                           |
| <i>pod-2</i>                                   |                   |                                                         |
| <i>sptl-1</i>                                  |                   |                                                         |
| ↓                                              | Membrane fusion   | <i>nsf-1</i>                                            |
|                                                |                   | <i>snap-29</i>                                          |
| <i>snap-1</i>                                  |                   |                                                         |
| ↓                                              | Muscle            | <i>let-805</i>                                          |
|                                                |                   | <i>vab-10</i>                                           |
| <i>pat-10</i>                                  |                   |                                                         |
| ↓                                              | NADPH oxidase     | <i>bli-3</i>                                            |
|                                                | Sorting           | <i>aps-1</i>                                            |
| <i>che-1</i>                                   |                   |                                                         |
| ↓                                              | PAR               | <i>cdc-42</i>                                           |
|                                                | Rabs              | <i>rab-5</i>                                            |
| ↓                                              | Ribosome          | <i>rpl-36</i>                                           |
|                                                | V-ATPase          | <i>vha-4</i>                                            |
| <i>unc-32</i>                                  |                   |                                                         |
| <i>vha-1</i>                                   |                   |                                                         |
| <i>vha-19</i>                                  |                   |                                                         |
| <i>vha-17</i>                                  |                   |                                                         |
| <i>vha-15</i>                                  |                   |                                                         |
| <i>vha-20</i>                                  |                   |                                                         |
| <i>vha-10</i>                                  |                   |                                                         |
| <i>vha-8</i>                                   |                   |                                                         |
| <i>vha-12</i>                                  |                   |                                                         |
| ↓                                              | Others            | <i>Uncharacterized protein family, transmembrane-17</i> |
|                                                |                   |                                                         |
| Common regulators of polarity and brush border |                   |                                                         |

**Table S1. Polarity maintenance screen results.** White and blue cases indicate the genes that affect CDC-42 apical localization and basolaterally mislocalize ERM-1, respectively.

**Table S2: Comparison of V0/*vha-1* and V1/*vha-8* silencing phenotypes**

|                                             | <b>L4440</b> | <b><i>vha-1(RNAi)</i> (V0)</b> | <b><i>vha-8(RNAi)</i> (V1)</b> |
|---------------------------------------------|--------------|--------------------------------|--------------------------------|
| CDC-42, PAR-6, PKC-3, ERM-1 apical PM       | Normal       | Down                           | Down (except ERM-1)            |
| Basolateral PAR-6, PKC-3, ERM-1             | No           | Yes                            | No                             |
| SNAP-29 cytoplasmic accumulation            | No           | Yes                            | No                             |
| Mixed organelles                            | No           | Yes                            | Yes                            |
| LMP-1, RAB-7, RAB-10 accumulation           | No           | Yes                            | Yes                            |
| Autophagy activation                        | No           | +++                            | +                              |
| Accumulation of cytoplasmic lucent vesicles | No           | Yes                            | No                             |
| RAB-11 signal                               | -            | Down                           | Up                             |
| Microvillus atrophy                         | No           | Yes                            | No                             |
| MVIs, vacuoles                              | No           | Yes                            | No                             |

**Table S3 : Comparison of MVID and V0-ATPase depletion phenotypes.**

Adapted from (49), with minor modifications.

| MVID phenotype                                             | Normal intestine       | <i>MYO5B</i> deficient patients                                              | <i>STX3</i> deficient patients                                                        | <i>MUNC18-2</i> deficient patients (FHL5)                            | <i>MUNC18-2</i> $\pm$ mouse organoids                                | <i>vha-1</i> RNAi <i>C. elegans</i>                               |
|------------------------------------------------------------|------------------------|------------------------------------------------------------------------------|---------------------------------------------------------------------------------------|----------------------------------------------------------------------|----------------------------------------------------------------------|-------------------------------------------------------------------|
| <b>microvillus atrophy (absent or abnormal microvilli)</b> | no                     | yes                                                                          | yes                                                                                   | yes                                                                  | yes                                                                  | yes (Fig 4)                                                       |
| <b>microvillus inclusions</b>                              | no                     | frequent, observed in 10% of cells                                           | infrequent                                                                            | infrequent, not fully penetrant                                      | frequent but only after differentiation                              | infrequent (Fig 5)                                                |
| <b>basolateral microvilli</b>                              | no                     | incomplete penetrance                                                        | frequent                                                                              | frequent                                                             | frequent but only after differentiation                              | probable (Fig 5)                                                  |
| <b>vesicle or tubulo-vesicular structures accumulation</b> | no                     | Apical vesicles and tubulovesicular; variable electron-dense and translucent | Apical vesicles and tubulovesicular; variable electron-dense and translucent (villus) | electron-dense and translucent apical vesicles                       | crypt: translucent apical villus: translucent tubulovesicular apical | endosome like vesicles and enlarged vacuolar structures (Fig 2)   |
| <b>RAB-11+ apical recycling endosomes loss</b>             | no                     | yes                                                                          | yes                                                                                   | yes                                                                  | yes                                                                  | yes (Fig 2)                                                       |
| <b>lysosomal abnormalities</b>                             | no                     | Enlarged (auto)lysosomes                                                     | Enlarged (auto)lysosomes                                                              | high number of lysosomes                                             | enlarged lysosomes                                                   | enlarged and high number of lysosomes (Fig 2)                     |
| <b>STX3 localization</b>                                   | apical membrane        | Subapical vesicle and MVIs                                                   | reduced/absent prote in level                                                         | subapical vesicle and MVIs                                           | diffuse in cytoplasm                                                 | UNC-64 (STX3 ortholog) membrane accumulation (Fig 3)              |
| <b>Brush border proteins defects (ERM-1, ACT-5)</b>        | strong in brush border | Reduced brush border signal, MVIs positive                                   | presence of dot- and ring-like structures                                             | reduced brush border, MVIs stained; variable penetrance and severity | reduced brush border, cytoplasmic foci and MVIs stained              | reduced brush border, presence of MVI structures (Fig 1, 4, 5, 6) |

**Table S4: *C. elegans* strains used in this study**

| Strain name | Genotype                                                                                                                                  | Reference               |
|-------------|-------------------------------------------------------------------------------------------------------------------------------------------|-------------------------|
| DA2123      | <i>adIs2122 [lgg-1p::GFP::lgg-1 + rol-6(su1006)]</i>                                                                                      | CGC                     |
| FL274       | <i>erm-1(bab59[erm-1::mNG<sup>SEC</sup>3xFlag]) I ; ifb-2(bab142[ifb-2::wSc]) II</i>                                                      | This study              |
| FL316       | <i>dfEx3 [vha-6p::gfp::cdc-42 + rol-6 (su1006)]; unc-119(ed3)III; mcls46 [dlg-1::rfp+unc-119(+)]</i>                                      | This study              |
| FL368       | <i>bls5[chc-1p::gfp::chc-1 + rol-6(su1006)]; jyls17 [vha-6p::mcherry::act-5, ttx-3p::RFP]</i>                                             | This study              |
| FL369       | <i>fgEx13[perm-1::erm-1::gfp + rol-6 (su1006)] ; jyls17 [vha-6p::mcherry::act-5, ttx-3p::RFP]</i>                                         | This study              |
| FL373       | <i>pkc-3(it309[GFP::pkc-3]) II; erm-1(bab64[erm-1::wrmSc<sup>3xFlag</sup>]) I</i>                                                         | This study              |
| FL374       | <i>rnyEx60 [pELA2 (vha-6p::vha-6::mCherry) + myo-3p::GFP + pCLI (pha-1+)] ; pwls69 [vha6p::GFP::rab-11 + unc-119(+)]</i>                  | This study              |
| FL375       | <i>unc-119(ed3) III; pwls69[vha6p::GFP::rab-11 + unc-119(+)] ; rnyEx60 [pELA2 (vha-6p::vha-6::mCherry) + myo-3p::GFP + pCLI (pha-1+)]</i> | This study              |
| FL376       | <i>pwls50 [Imp-1::GFP + Cbr-unc-119(+)] ; erm-1(bab64[erm-1::wrmSc<sup>3xFlag</sup>]) I</i>                                               | This study              |
| FL378       | <i>erm-1(bab59[erm-1::mNG<sup>SEC</sup>3xFlag]) I</i>                                                                                     | This study              |
| FL379       | <i>erm-1(bab64[erm-1::wrmSc<sup>3xFlag</sup>]) I</i>                                                                                      | This study              |
| FS254       | <i>slcf-1(tm2258); Exfs254[slcf-1::gfp]</i>                                                                                               | Mouchiroud et al., 2010 |
| GK385       | <i>unc-119(ed3) ; dkIs218[Popt-2-GFP-syn-1 ; Cb.unc-119(+)]</i>                                                                           | Sato et al., 2011       |
| GK446       | <i>unc-119(ed3) ; dkIs259[Pact-5-GFP-snap-29 ; Cb.unc-119(+)]</i>                                                                         | Sato et al., 2011       |
| KK1228      | <i>pkc-3(it309[GFP::pkc-3]) II</i>                                                                                                        | CGC                     |
| KK1248      | <i>par-6(it319[par-6::GFP]) I</i>                                                                                                         | CGC                     |
| KWN117      | <i>rnyEx60 [pELA2 (vha-6p::vha-6::mCherry) + myo-3p::GFP + pCLI (pha-1+)]</i>                                                             | CGC                     |
| KWN246      | <i>pha-1(e2123) III, rnyEx133[opt-2(aa1-412)::GFP] + pha-1(+)]</i>                                                                        | CGC                     |
| MCP111      | <i>pgp-1(bab111[mNG<sup>3xFlag</sup>::pgp-1]) IV</i>                                                                                      | This study              |
| MCP91       | <i>unc-64(bab91[wrmSc<sup>3xFlag</sup>::unc-64]) III</i>                                                                                  | This study              |
| RT258       | <i>pwls50 [Imp-1::GFP + Cbr-unc-119(+)]</i>                                                                                               | CGC                     |
| RT311       | <i>pwls69 [vha6p::GFP::rab-11 + unc-119(+)]</i>                                                                                           | CGC                     |
| RT327       | <i>pwls72 [vha-6p::GFP::rab-5 + Cbr-unc-119(+)]</i>                                                                                       | CGC                     |
| RT476       | <i>pwls170 [vha6p::GFP::rab-7 + Cbr-unc-119(+)]</i>                                                                                       | CGC                     |
| RT525       | <i>pwls206 [vha6p::GFP::rab-10 + Cbr-unc-119(+)]</i>                                                                                      | CGC                     |
| VJ268       | <i>fgEx12[pact-5::act-5::gfp]</i>                                                                                                         | Zhang et al., 2012      |
| VJ500       | <i>let-767(s2176) dpy-17(e164) unc-32(e189)III; sDp3(III); fgEx13[perm-1::erm-1::gfp rol-6(su1006)]</i>                                   | Zhang et al., 2011      |

**Table S5. List of the targeted genes in the RNAi screen.**

[Click here to Download Table S5](#)

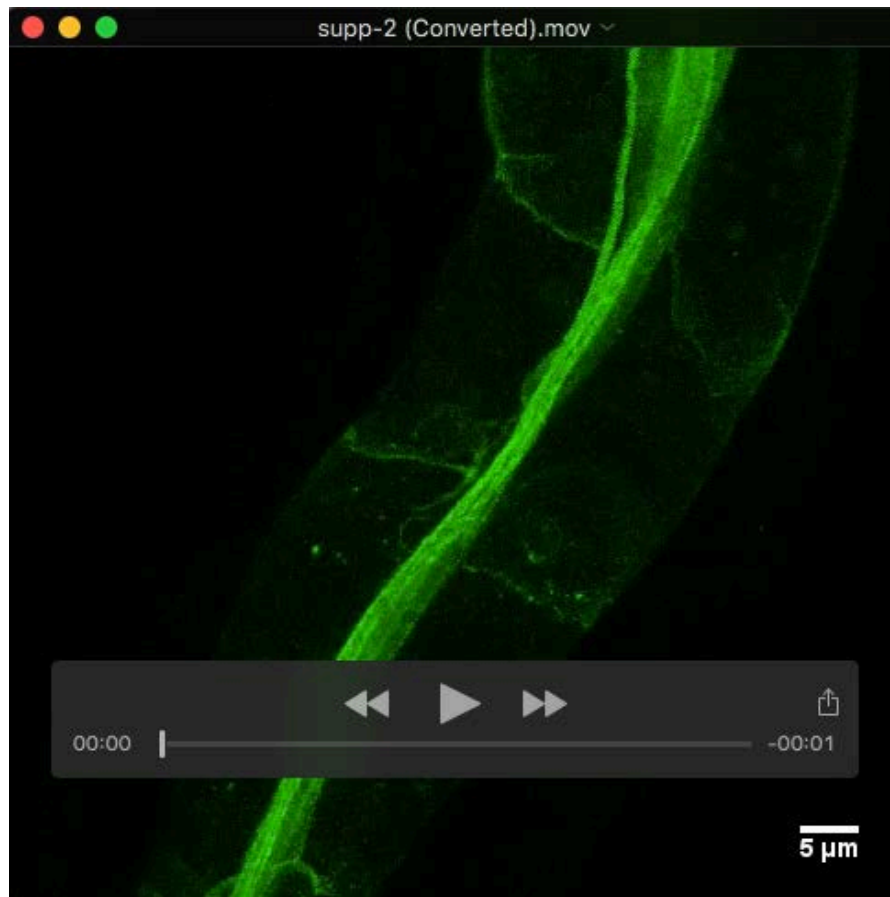

**Movie 1. Cytoplasmic nucleation of MVIs.** Maximum projection of ERM-1::mNG expressing worms silenced for *V0/vha-1* during 96h. Arrows indicate nucleating MVIs.



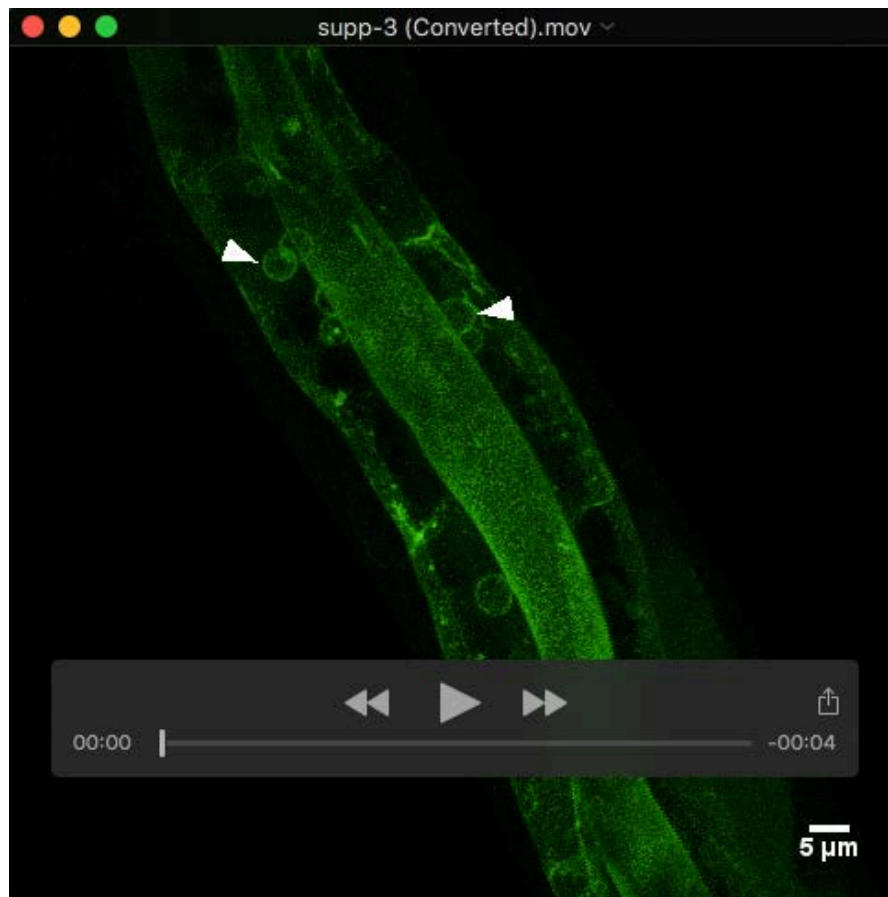

**Movie 2. Cytoplasmic nucleation of MVIs.** Maximum projection of ERM-1::mNG expressing worms silenced for *V0/vha-1* during 96h. Arrowheads and arrows indicate irregular MVIs/vacuoles and cytoplasmic nucleating MVIs, respectively.

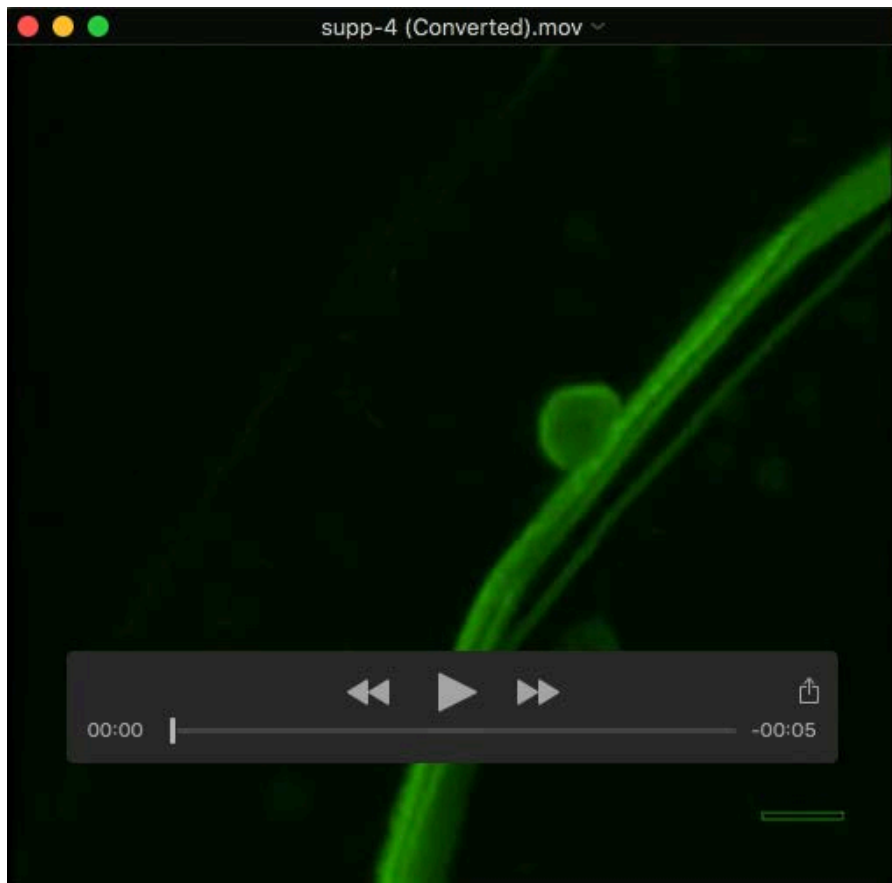

**Movie 3. MVI formation by internalization of the apical PM.** 3D projection of ERM-1::GFP expressing worms silenced for *V0/vha-1* during 72h.

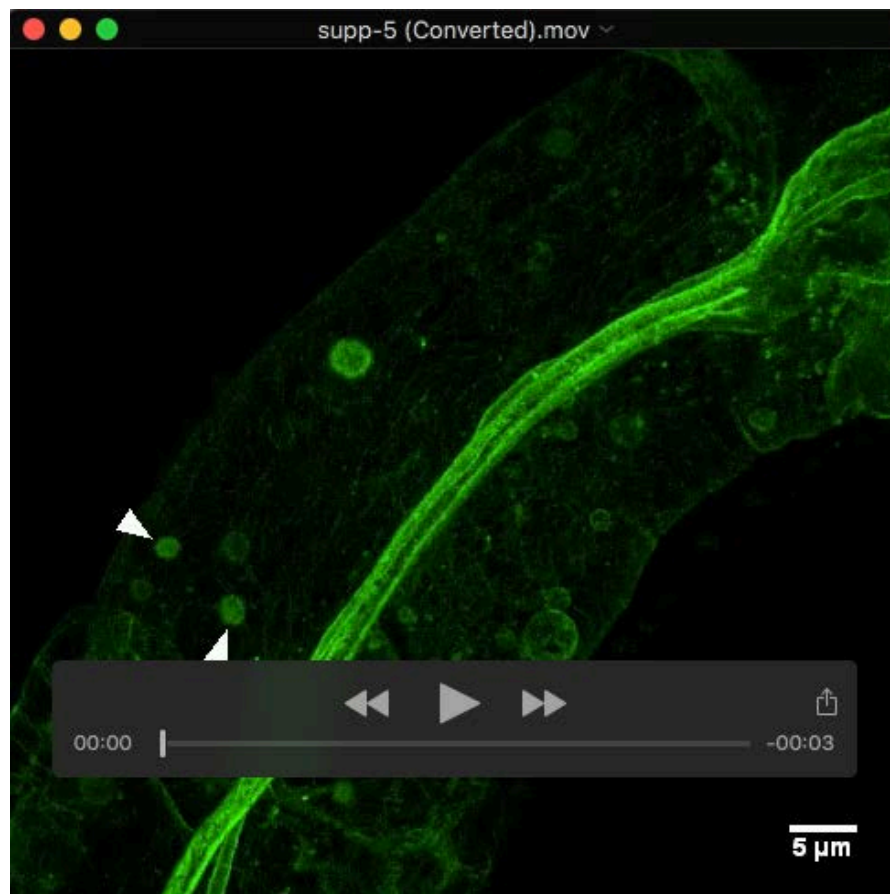

**Movie 4. MVI elimination.** Maximum projection of ERM-1::mNG expressing worms silenced for *V0/vha-1* during 96h. The arrow indicates the elimination of the MVIs inside the presumptive autophagic ERM-1<sup>+</sup> membrane. Arrowheads show direct MVI disappearance in the cytoplasm.
